# Supplementary material for: Fibrinogen induces neural stem cell differentiation into astrocytes in the subventricular zone via BMP signaling
Source: PubMed Central journal article supplement (PMC6994610; doi:10.1038/s41467-020-14466-y), 2020-01-31
Supplement: 41467_2020_14466_MOESM1_ESM.pdf [file 41467_2020_14466_MOESM1_ESM.pdf]

**Fibrinogen induces neural stem cell differentiation into astrocytes in  
the subventricular zone via BMP signalling**

*Pous et al.*

Supplementary Information

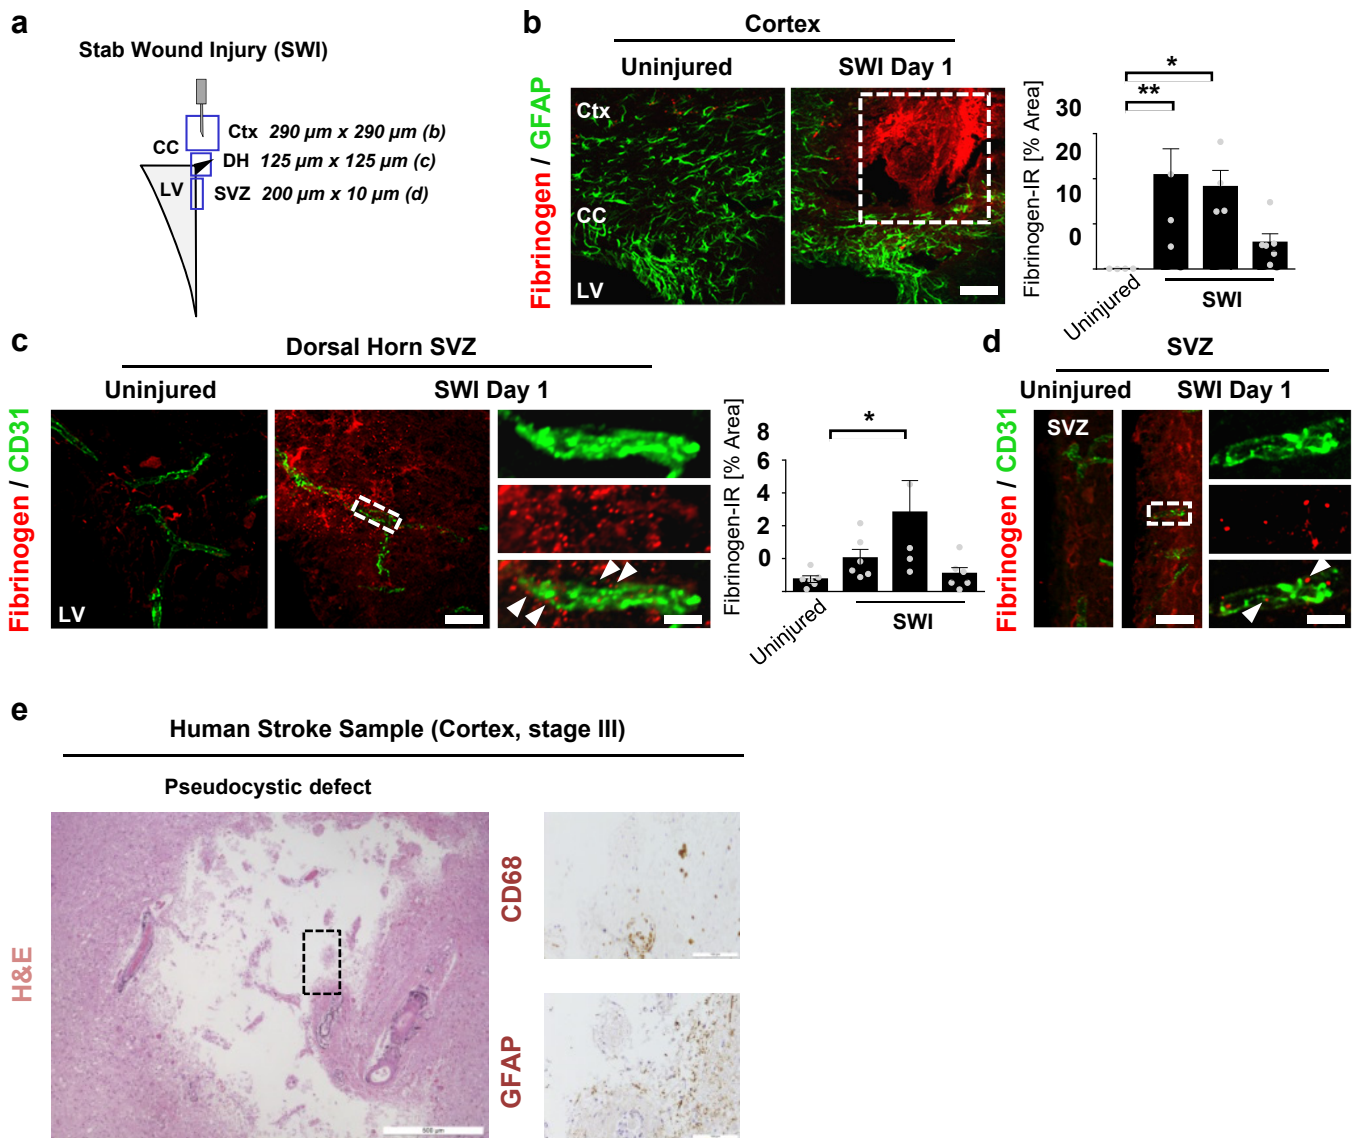

**Supplementary Figure 1. Fibrinogen deposition in the SVZ after cortical stab wound injury.** **a** Scheme illustrating the areas of analysis after stab wound injury. The blue boxes indicate the magnified areas analyzed in the figures b, c and d. **b** GFAP<sup>+</sup> astrocytes (green) and fibrinogen (red) in the cortex 1 day after SWI and uninjured mice. The white box indicates the quantification area for fibrinogen immunoreactivity. Scale bar, 70  $\mu\text{m}$ . Quantification of fibrinogen immunoreactivity in the cortex per area at different time points after SWI ( $n=4$ , mean  $\pm$  s.e.m, one-way ANOVA and Bonferroni's multiple comparisons test,  $*P<0.05$ ,  $**P<0.01$ ). **c** CD31<sup>+</sup> blood vessels (green) and fibrinogen (red) in the dorsal horn of the SVZ injured mice 1 day after SWI and uninjured mice. The white box indicates the enlargement of a blood vessel with extravascular fibrinogen deposition (white arrows) 1 day after SWI (right). Scale bars, 21  $\mu\text{m}$ , left, 7  $\mu\text{m}$ , enlargement. Quantification of fibrinogen immunoreactivity in the dorsal horn of the SVZ per area at different time points after SWI ( $n=4$ , mean  $\pm$  s.e.m, one-way ANOVA and Bonferroni's multiple comparisons test,  $*P<0.05$ ). **d** Representative images of CD31<sup>+</sup> blood vessels (green) and fibrinogen (red) in the SVZ 1 day after SWI and uninjured mice. The white box indicates the enlargement of a blood vessel with extravascular fibrinogen deposition (white arrows) 1 day after SWI (right) ( $n=4$ ). Scale bar, 28  $\mu\text{m}$ , left, 8  $\mu\text{m}$ , enlargement. **e** Hematoxylin/Eosin (H&E) labeling of the cortical stroke region of a patient (stadium III) (left). Black box indicating enlargement of CD68<sup>+</sup> macrophages (right top) and GFAP<sup>+</sup> astrocytes (right bottom) surrounding the stroke area. SVZ, subventricular zone, LV, lateral ventricle, Ctx, cortex, CC, corpus callosum.

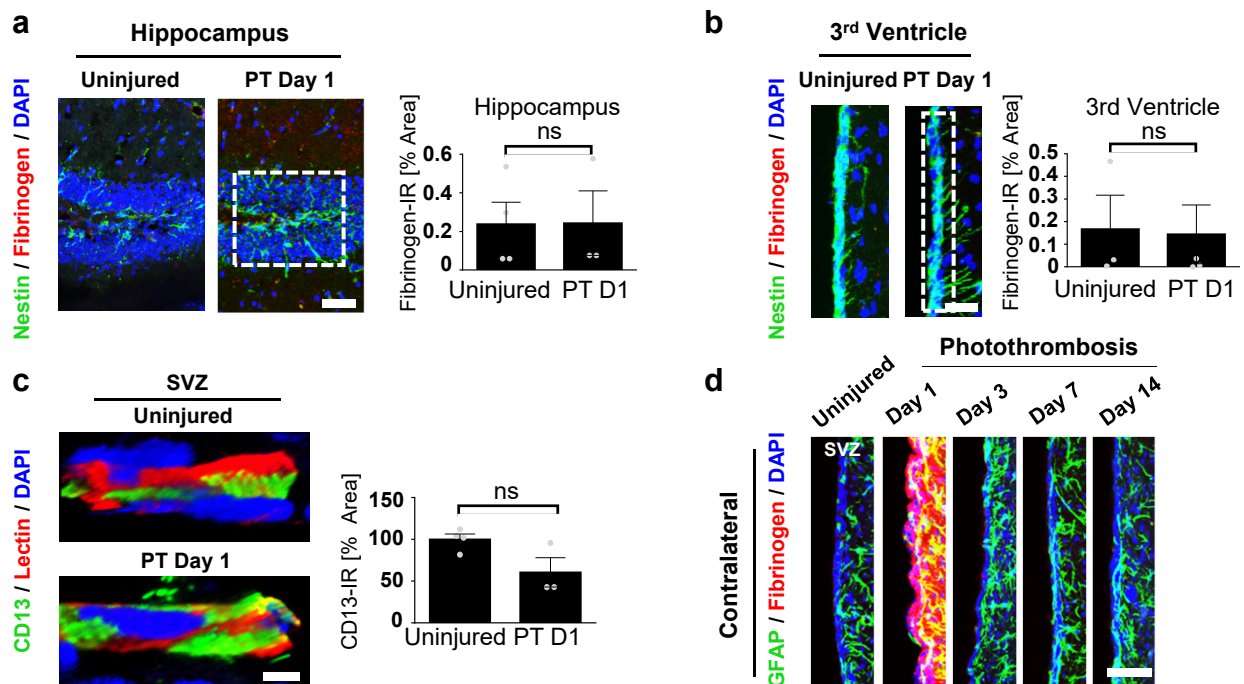

**Supplementary Figure 2. Fibrinogen deposition after cortical injury is specific to the SVZ stem cell niche.** **a** Nestin<sup>+</sup> NSPCs (green) and fibrinogen (red) in the dentate gyrus of the hippocampus of uninjured and injured mice 1 day after photothrombotic ischemia. The white box represents the quantification area for fibrinogen immunoreactivity. Scale bar, 51  $\mu$ m, left ( $n=4$  mice, mean $\pm$ s.e.m., unpaired Student's  $t$  test, ns, not significant). **b** Nestin<sup>+</sup> NSPCs (green) and fibrinogen (red) lining the third ventricle 1 day after photothrombotic ischemia. The white box represents the quantification area for fibrinogen immunoreactivity. Scale bar, 22  $\mu$ m. Quantification for fibrinogen immunoreactivity around the third ventricle per area ( $n=3$  for uninjured,  $n=4$  for PT Day 1 mice, mean $\pm$ s.e.m., unpaired Student's  $t$  test, ns, not significant). **c** CD13<sup>+</sup> pericytes (green) and lectin<sup>+</sup> blood vessels (red) in the SVZ of WT uninjured and injured mice 1 day after PT. Scale bar, 4  $\mu$ m. Quantification for CD13 immunoreactivity (i.e. pericyte coverage) around the blood vessels in the SVZ of uninjured and injured mice (PT Day 1) ( $n=3$  mice, mean $\pm$ s.e.m., unpaired Student's  $t$  test, ns, not significant). **d** Representative images of GFAP<sup>+</sup> astrocytes (green) and fibrinogen (red) in the contralateral SVZ at different time points after photothrombotic ischemia ( $n=4$  mice). Scale bar, 57  $\mu$ m. SVZ, subventricular zone.

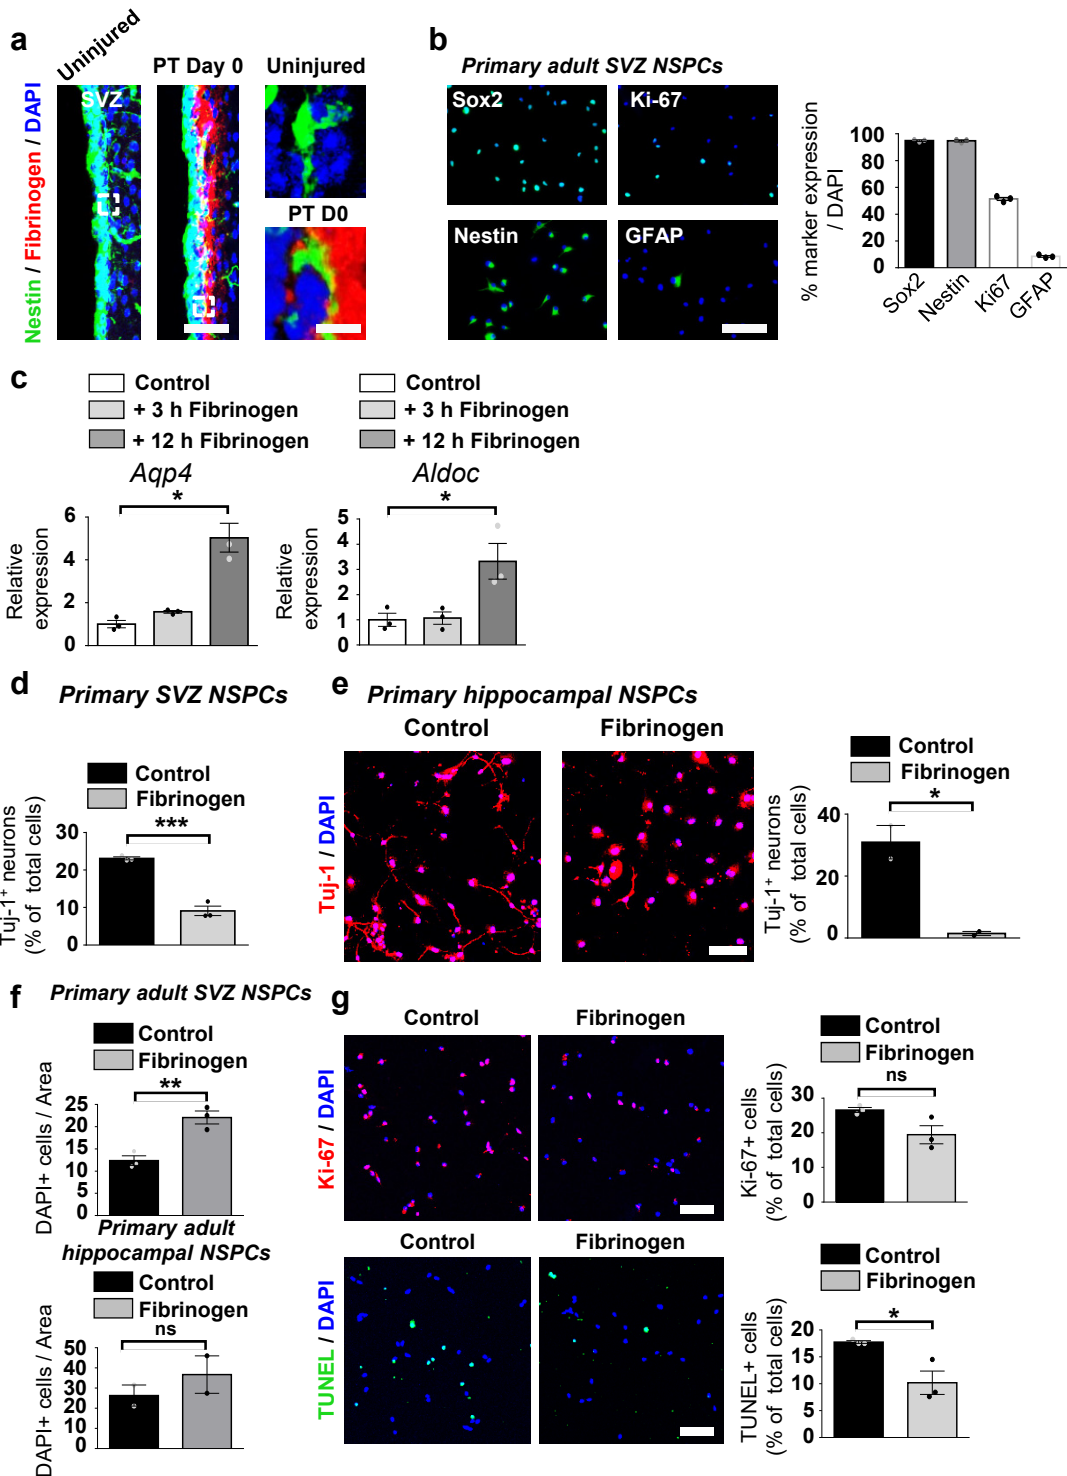

**Supplementary Figure 3. Promotion of fibrinogen-induced NSPCs towards astrogenesis over neurogenesis.**

**a** Representative images of nestin<sup>+</sup> NSPCs (green) and fibrinogen (red) in the SVZ stem cell niche 5 h after photothrombotic ischemia (PT Day 0). The white boxes indicate the enlargement of fibrinogen deposition in the stem cell niche environment (right, bottom) compared to no fibrinogen deposition in the uninjured control (right, top). Scale bars, 36  $\mu\text{m}$ , left and 5  $\mu\text{m}$ , enlargement. **b** Sox2, Ki-67, Nestin and GFAP (green) immunostainings in untreated adult SVZ-derived primary NSPC cultures 3 hours after initiation of differentiation. Scale bar: 100  $\mu\text{m}$ . Quantification of the number of cells positive for the individual NSPC marker. Results are from 3 independent experiments (mean $\pm$ s.e.m). **c** *Aqp4* (left) and *Aldoc* (right) mRNA expression in NSPCs after 3 h and 12 h of fibrinogen treatment determined by quantitative PCR and normalized to *GAPDH* ( $n=3$  mice, mean $\pm$ s.e.m, unpaired Student's *t* test,  $*P<0.05$ ). **d** Quantification of Tuj-1<sup>+</sup> neurons in untreated and fibrinogen-treated adult SVZ-derived WT NSPC cultures after 4 days on poly-D-lysine. ( $n=3$  mice, mean $\pm$ s.e.m., unpaired Student's *t* test,  $***P<0.001$ ). **e** Tuj-1<sup>+</sup> neurons (red) in untreated and fibrinogen-treated adult hippocampal NSPC cultures after 7 days on poly-D-lysine/laminin. Scale bar, 104  $\mu\text{m}$ . Quantification of Tuj-1<sup>+</sup> neurons of fibrinogen-treated adult hippocampal NSPCs compared to untreated NSPCs. Results are from 2 independent experiments performed in duplicate (mean $\pm$ s.e.m., unpaired Student's *t* test,  $*P<0.05$ ). **f** Quantification of the DAPI<sup>+</sup> nuclei in fibrinogen-treated SVZ-derived primary NSPCs (top) and hippocampal-derived NSPCs (bottom) compared to untreated NSPCs after 4 days of differentiation. Results are from 3 independent experiments (top) and 2 independent experiments performed in duplicates (bottom). (mean $\pm$ s.e.m., unpaired Student's *t* test,  $**P<0.01$ , ns not significant). **g** Ki-67<sup>+</sup> proliferating cells (red, top) and TUNEL<sup>+</sup> apoptotic cells (green, bottom) of untreated and fibrinogen-treated adult SVZ-derived NSPCs cultured for 1 day on poly-D-lysine. Scale bars, 104  $\mu\text{m}$ . Quantification of Ki-67<sup>+</sup> proliferating (top) and TUNEL<sup>+</sup> apoptotic (bottom) NSPCs treated with fibrinogen compared to untreated cells after 1 day on poly-D-lysine. Results are from 3 independent experiments (mean $\pm$ s.e.m., unpaired Student's *t* test,  $P<0.05$ , ns=not significant). SVZ, subventricular zone.

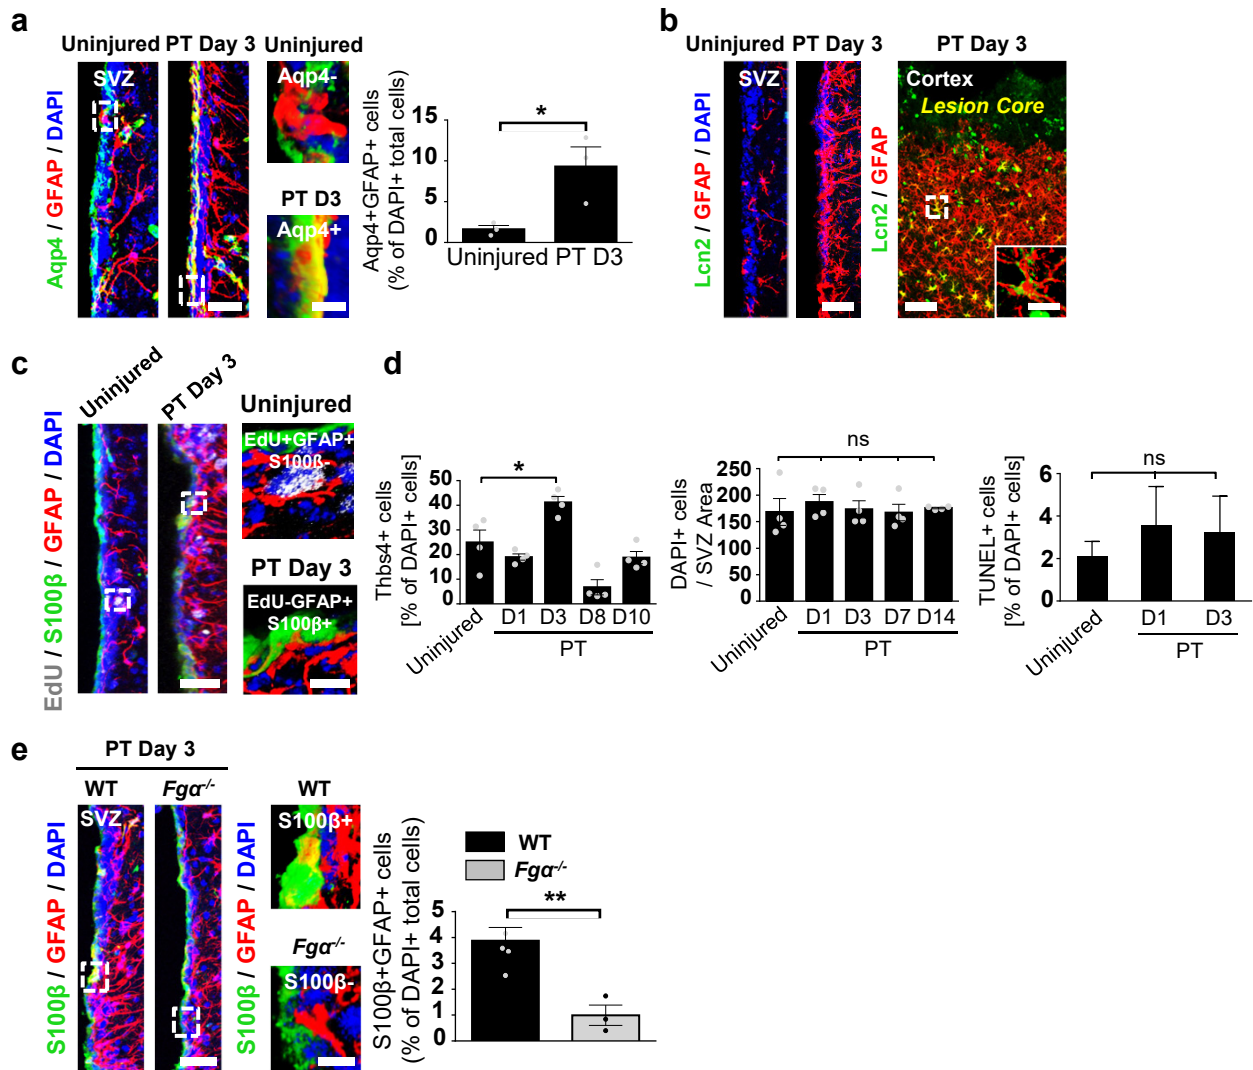

**Supplementary Figure 4. Fibrinogen depletion reduces SVZ astrogliogenesis after PT.** **a** Aqp4 (green) and GFAP (red) immunostainings in the SVZ of uninjured and injured mice 3 days after PT. The white boxes indicate the enlargement of Aqp4-GFAP+ (right, top) and Aqp4+GFAP+ (right, bottom) cells in the SVZ of uninjured and injured mice, respectively. Scale bar, 26  $\mu$ m, left, 5  $\mu$ m, enlargement. Quantification of the Aqp4+GFAP+ astrocytes in the SVZ after PT ( $n=3$  mice, mean $\pm$ s.e.m., unpaired Student's  $t$  test,  $*P<0.05$ ). **b** Representative images of Lcn2 (green) and GFAP (red) immunostainings in the SVZ (left) of uninjured and injured mice and in the cortex of injured mice (right) 3 days after PT. The white box indicates the enlargement of a Lcn2+GFAP+ cell in the cortex of injured mice ( $n=3$  mice). Scale bars, 22  $\mu$ m, left, 116  $\mu$ m, right, 10  $\mu$ m, enlargement. **c** Representative images of EdU (grey), S100 $\beta$  (green) and GFAP (red) immunostainings in the SVZ at 3 days after PT. The white boxes indicate the enlargement of an EdU+GFAP+S100 $\beta$ - (right, top) and EdU-S100 $\beta$ +GFAP+ (right, bottom) cell in the SVZ of uninjured and injured mice (PT day 3), respectively ( $n=4$  mice). Scale bar, 25  $\mu$ m. 5  $\mu$ m, enlargement. **d** Quantifications of Thbs4+ cells (left) and DAPI+ cells (middle) and TUNEL+ cells (right) in the SVZ at different time points after PT ( $n=3$  (left),  $n=4$  (middle),  $n=4$  mice (right), mean $\pm$ s.e.m., one-way ANOVA and Bonferroni's multiple comparisons test,  $*P<0.05$ , ns, not significant). **e** S100 $\beta$  (red) and GFAP (green) immunostainings in the SVZ of *Fga*<sup>-/-</sup> mice compared to WT mice 3 days after photothrombotic ischemia. The white boxes indicate the enlargement of a S100 $\beta$ +GFAP+ and a S100 $\beta$ -GFAP+ cell in the SVZ of WT (top) and *Fga*<sup>-/-</sup> (bottom) mice, respectively, 3 days after PT. Scale bars, 36  $\mu$ m, left and 7  $\mu$ m, enlargement. Quantification of S100 $\beta$ +GFAP+ cells in the SVZ per area ( $n=5$  WT mice,  $n=3$  injured *Fga*<sup>-/-</sup> mice, mean $\pm$ s.e.m., unpaired Student's  $t$  test  $**P<0.01$ ). SVZ, subventricular zone.

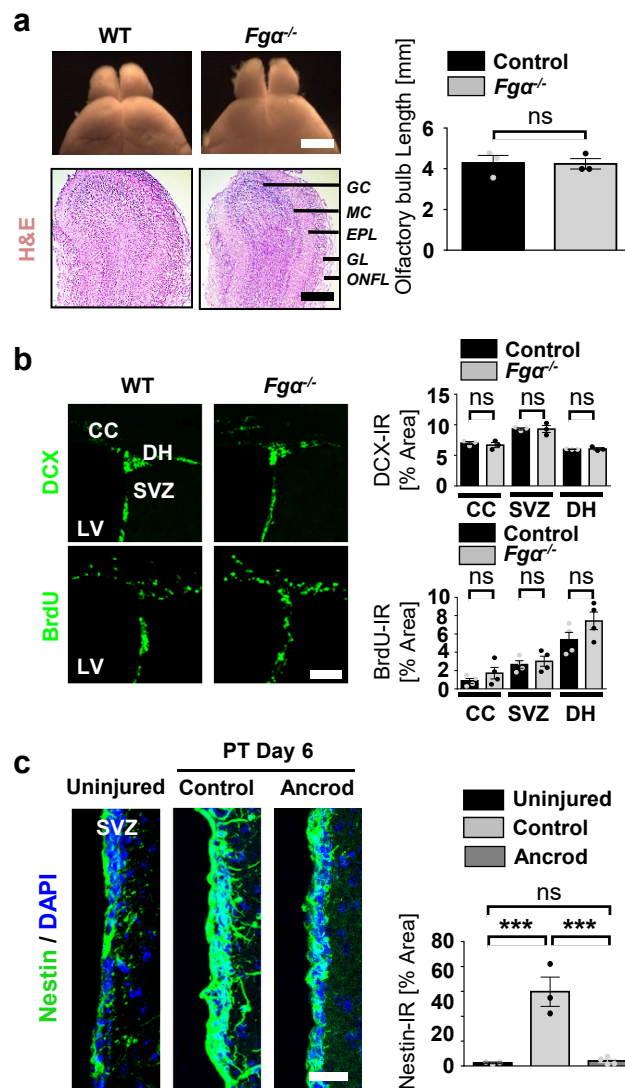

**Supplementary Figure 5. Unaffected SVZ NSPC pool after genetic and pharmacologic depletions of fibrinogen.**

**a** Overview of olfactory bulb images of WT and *Fga*<sup>-/-</sup> mice (top) and Hematoxylin/Eosin (H&E) labeling of WT and *Fga*<sup>-/-</sup> mice (bottom). Scale bars, 5.7 mm, top, 329  $\mu$ m, bottom. Quantification of olfactory bulb size of *Fga*<sup>-/-</sup> and WT control mice. ( $n=3$  mice, mean $\pm$ s.e.m., unpaired Student's *t* test, ns, not significant). **b** DCX<sup>+</sup> (top) and BrdU<sup>+</sup> (bottom) NSPCs labeling of uninjured *Fga*<sup>-/-</sup> and WT control mice. Scale bar, 260  $\mu$ m. Quantification of DCX and BrdU immunoreactivity in the corpus callosum (CC), the dorsal horn of the SVZ (DH-SVZ) and the SVZ of uninjured *Fga*<sup>-/-</sup> and WT control mice. ( $n=4$  mice, mean $\pm$ s.e.m., one-way ANOVA and Bonferroni's multiple comparisons test, ns, not significant). **c** Nestin (green) immunostaining in the SVZ of ancrod-treated and control mice 6 days after PT compared to uninjured WT mice. Scale bar, 33  $\mu$ m. Quantification of nestin immunoreactivity of ancrod-treated and control mice 6 days after PT compared to uninjured WT mice (control PT  $n=3$ , ancrod PT  $n=4$ , uninjured  $n=3$  mice, mean $\pm$ s.e.m., one-way ANOVA and Bonferroni's multiple comparisons test \*\*\* $P<0.001$ , ns, not significant). LV, Lateral Ventricle; CC, Corpus Callosum; CTX, Cortex; DH, Dorsal Horn, SVZ, subventricular zone.

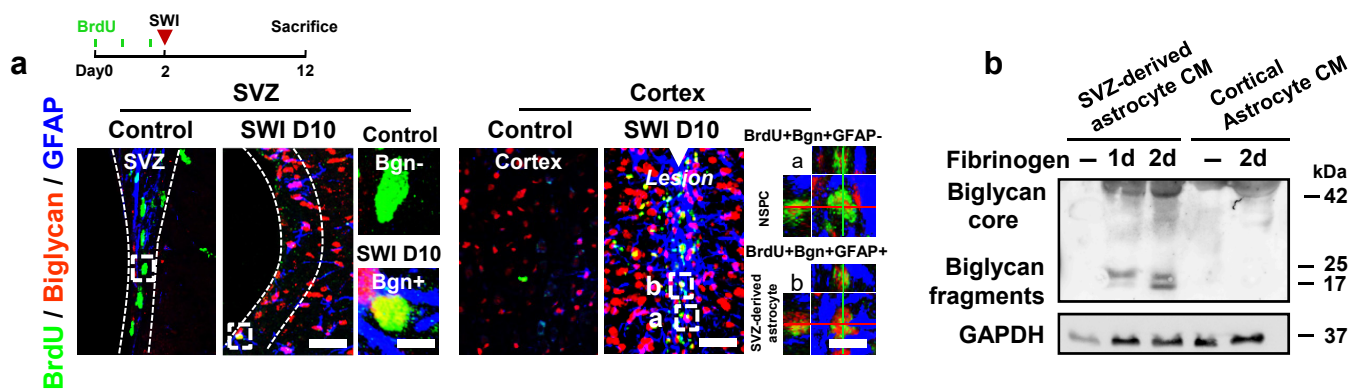

**Supplementary Figure 6. Fibrinogen induces NSPC expression and secretion of biglycan.** **a** Immunolabeling for biglycan (red), GFAP (blue) and BrdU (green) in the SVZ of WT mice 10 days after SWI compared to control mice (left). White boxes indicate the enlargement of biglycan-GFAP-BrdU<sup>+</sup> and biglycan+GFAP+BrdU<sup>+</sup> cells in the SVZ of control mice (right, top) and mice 10 days after SWI (right, bottom), respectively. Scale bars, 30  $\mu$ m, left and 8  $\mu$ m, enlargement. Representative images of n=3 mice. Immunolabeling for biglycan (red), GFAP (blue) and BrdU (green) in the cortex of WT mice 10 days after SWI compared to control mice (right). White boxes indicate the enlargement of biglycan+GFAP-BrdU<sup>+</sup> (a, right, top) and biglycan+GFAP+BrdU<sup>+</sup> (b, right, bottom) SVZ-derived NSPCs and SVZ-derived newborn astrocytes in the lesion area of mice 10 days after SWI, respectively. Scale bars, 30  $\mu$ m, left and 7  $\mu$ m, enlargement. Representative images of n=3 mice. **b** Western blot analysis of biglycan protein expression in supernatant of NSPCs or cortical astrocytes after fibrinogen treatment. Representative immunoblots from three independent experiments are shown. SVZ, subventricular zone.



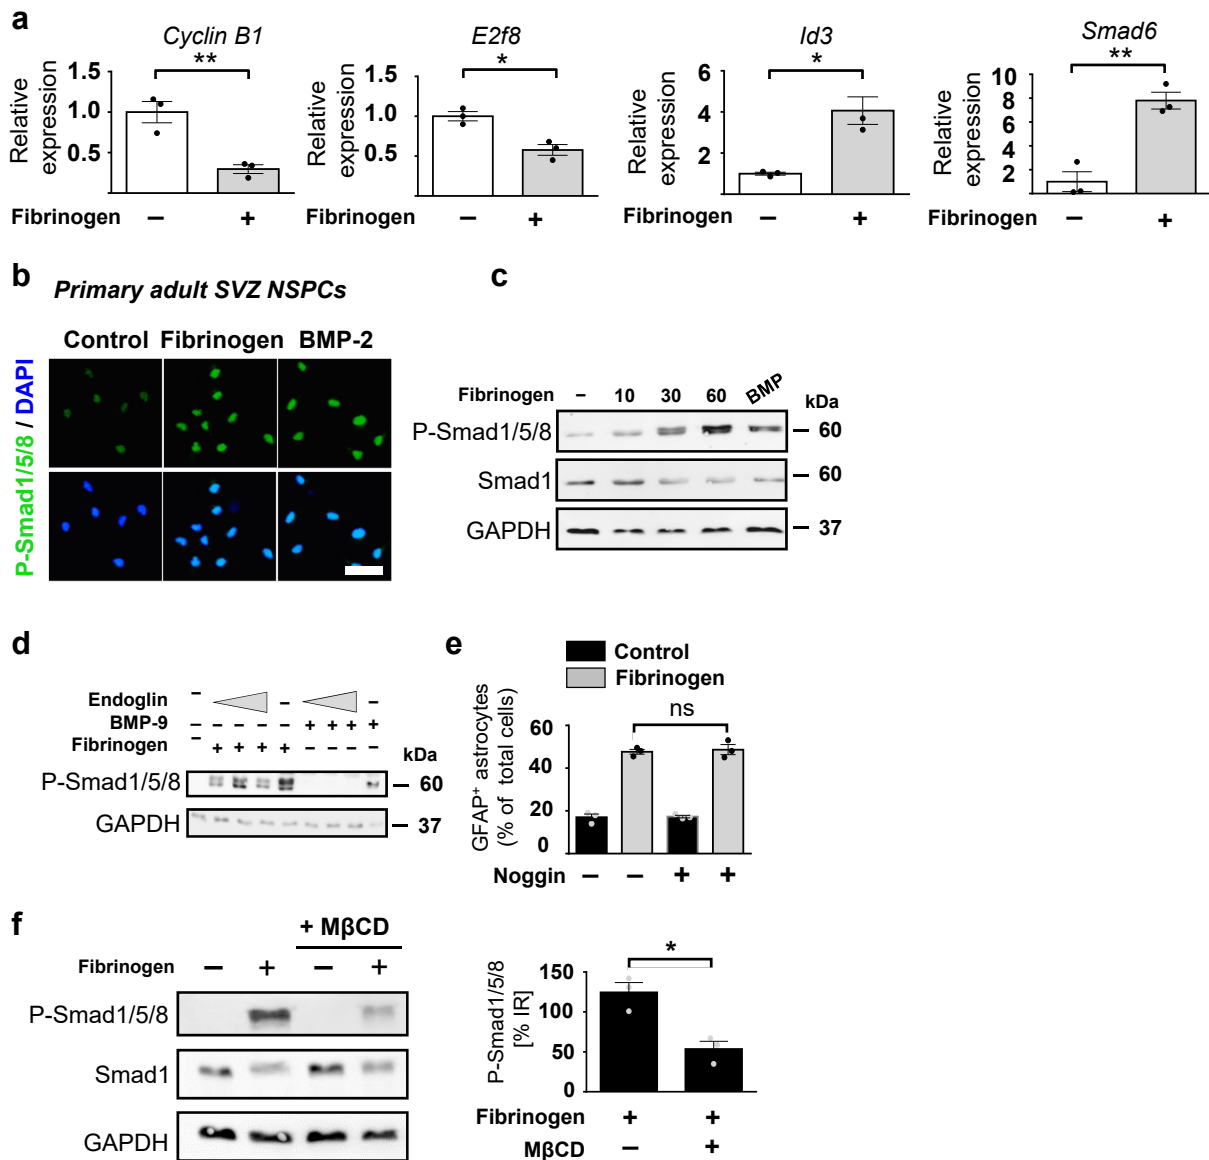

**Supplementary Figure 7. Fibrinogen activates BMP type I receptor signaling via lipid rafts.** **a** Expression of *Cyclin B1*, *E2f8*, *Id3* and *Smad6* mRNAs in NSPCs after 12 h of fibrinogen treatment determined by quantitative PCR and normalized to *GAPDH*. Results are from 3 independent experiments (mean±s.e.m., unpaired Student's *t* test, \* $P$ <0.05, \*\* $P$ <0.01). **b** P-Smad1/5/8 immunolabeling (green) of NSPCs treated for 1 hour with fibrinogen compared to untreated cells. BMP-2 treatment served as positive control. Scale bar, 58  $\mu$ m. **c** Immunoblot for P-Smad1/5/8 and Smad1 in NSPCs treated with fibrinogen for 10, 30 or 60 minutes or left untreated. BMP-2 served as positive control. Representative immunoblot from 3 independent experiments is shown. **d** Immunoblot for P-Smad1/5/8 in NSPCs pretreated with increasing concentration of endoglin inhibitor 1 h before fibrinogen treatment. BMP-9 served as positive control. A representative immunoblot from 2 independent experiments is shown. **e** Quantification of GFAP<sup>+</sup> astrocytes derived from differentiated WT NSPCs pretreated with Noggin 1 h before fibrinogen treatment. Results from 3 independent experiments are shown (mean±s.e.m., one-way ANOVA and Bonferroni's multiple comparisons test, ns, not significant). **f** Immunoblot for P-Smad1/5/8 and Smad1 in NSPCs pretreated with the lipid raft inhibitor M $\beta$ CD 5 h before fibrinogen treatment. Quantification of P-Smad1/5/8 immunoreactivity normalized to GAPDH loading control. Results are from 3 independent experiments (mean±s.e.m., unpaired Student's *t* test, \* $P$ <0.05).

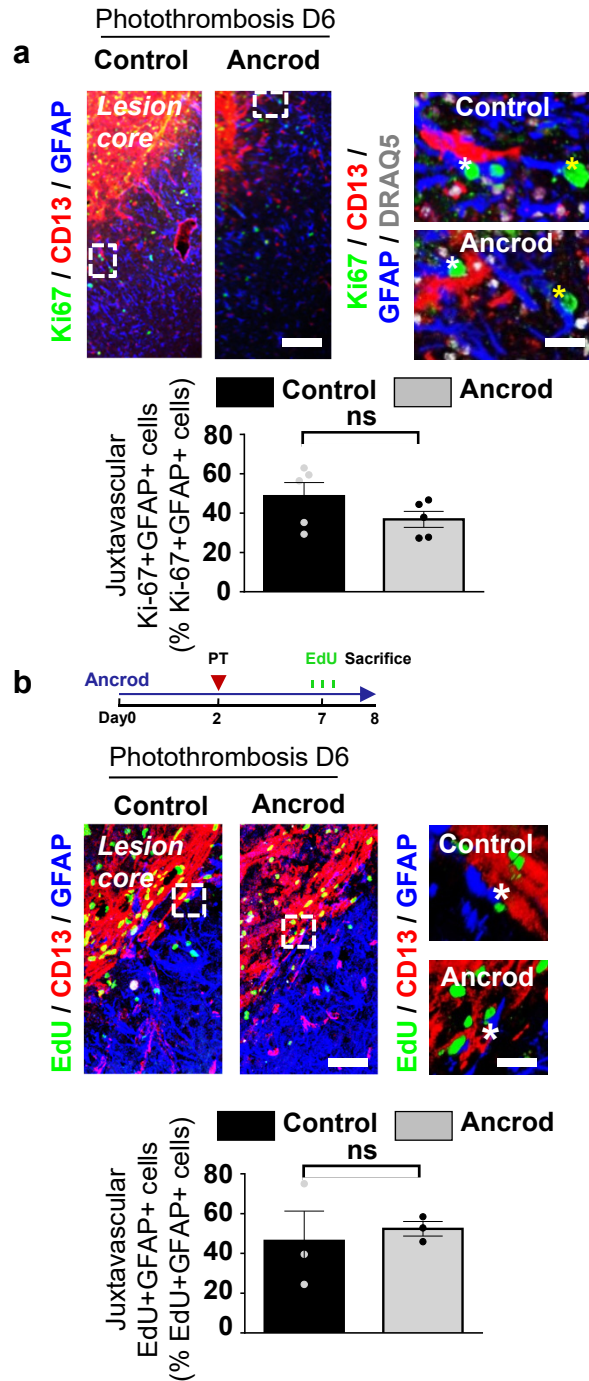

**Supplementary Figure 8. Fibrinogen does not affect juxtavascular astrocyte proliferation after PT.** **a** Ki-67 (green), CD13 (red), GFAP (blue) immunostainings in the lesion area of fibrinogen-depleted mice (Ancrod) compared to controls (NaCl) at 6 days after PT. The white boxes indicate the enlargement of a Ki67+GFAP+DRAQ5+ cell in direct contact with CD13+ blood vessel in ancrod and control mice (right). The white and yellow stars point out juxtavascular and non juxtavascular proliferating astrocytes, respectively. Quantification of juxtavascular Ki67+GFAP+ astrocytes in ancrod and control mice (n=5 mice, mean±s.e.m., unpaired Student's *t* test, ns, not significant). **b** EdU (green), CD13 (red), GFAP (blue) immunostainings in the lesion area of fibrinogen-depleted mice (Ancrod) compared to controls (NaCl) at 6 days after PT. The white boxes indicate the enlargement of a EdU+GFAP+ cell in direct contact with CD13+ blood vessel in ancrod and control mice (right). The white stars point out juxtavascular newborn astrocytes, respectively. Quantification of juxtavascular EdU+GFAP+ astrocytes in ancrod and control mice (n=4 mice, mean±s.e.m., unpaired Student's *t* test, ns, not significant).

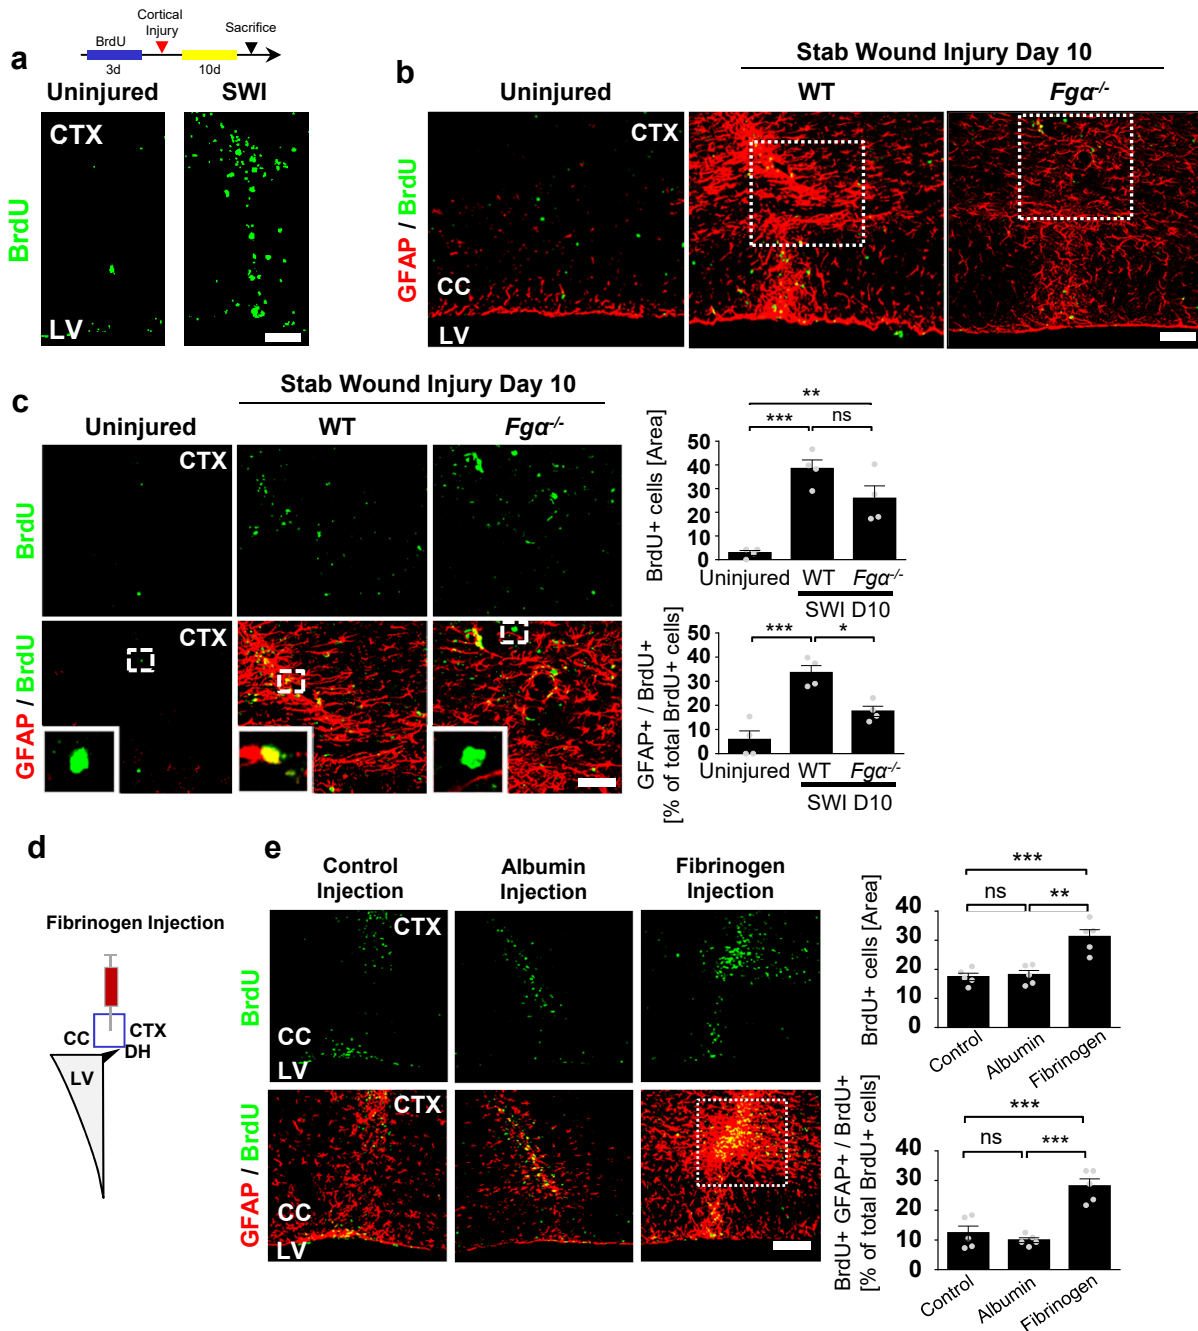

**Supplementary Figure 9. Fibrinogen drives the SVZ-derived astrocyte contribution to the lesion scar. a** Experimental setup for stab wound injury on BrdU-injected WT mice (top). Representative images of BrdU (green) immunostaining in the cortex of mice 10 days after SWI compared to uninjured mice. Scale bar: 55  $\mu$ m. **b** Representative images of BrdU (green) and GFAP (red) immunostainings in uninjured WT mice and injured WT and *Fga*<sup>-/-</sup> mice in the cortex 10 days after SWI. The white boxes indicate the quantified areas shown in **c**. Scale bar: 80  $\mu$ m. **c** BrdU (green) and GFAP (red) immunostainings in uninjured WT mice and injured WT and *Fga*<sup>-/-</sup> mice in the lesion area 10 days after SWI. The white boxes indicate the enlargement of BrdU+GFAP+ cells in uninjured WT and injured *Fga*<sup>-/-</sup> mice and a BrdU+GFAP+ cell in a injured WT mouse. Scale bar: 40  $\mu$ m. Quantification of BrdU<sup>+</sup> (top) and BrdU<sup>+</sup>GFAP<sup>+</sup> (bottom) cells in WT and *Fga*<sup>-/-</sup> mice at 10 days after SWI compared to uninjured WT mice (n=4 mice, mean $\pm$ s.e.m., one-way ANOVA and Bonferroni's multiple comparisons test, \*\*\*P < 0.001, \*\*P < 0.01, \*P < 0.05 and ns, not significant). **d** Experimental setup for stereotaxic injection of fibrinogen into the cortex. **e** BrdU (green) and GFAP (red) immunostainings of WT mice injected with NaCl (Control), albumin or fibrinogen in the cortex. The white box indicates the quantification area. Scale bar, 140  $\mu$ m. Quantification of BrdU<sup>+</sup> (top) and BrdU<sup>+</sup>GFAP<sup>+</sup> (bottom) cells (n=4 mice, mean $\pm$ s.e.m., one-way ANOVA and Bonferroni's multiple comparisons test, \*\*\*P < 0.001, \*\*P < 0.01 and ns, not significant). LV, Lateral Ventricle; CC, Corpus Callosum; CTX, Cortex; DH, Dorsal Horn.

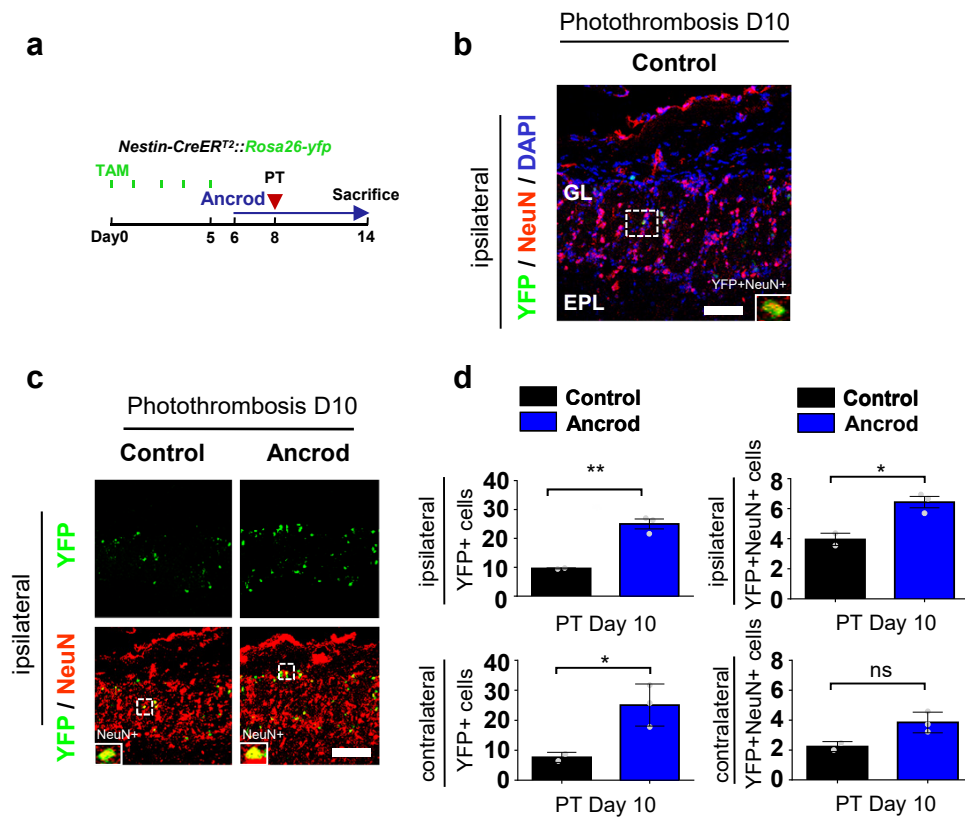

**Supplementary Figure 10. Fibrinogen depletion increases the SVZ-derived neuron contribution in OBs after PT.** **a** Experimental setup for ancrod-administered *Nestin-CreER<sup>T2</sup>::Rosa26-yfp* mice. TAM: tamoxifen (top). **b** Representative image of the OB of control (NaCl) treated WT mice with immunolabeling for YFP (green) and NeuN (red) 10 days after PT. **c** High magnification images of the glomerular layer of the OB of ancrod treated and control WT mice with immunolabeling for YFP (green) and NeuN (red) 10 days after PT. **d** Quantification of YFP+ cells and of YFP+NeuN+ cells of ancrod and control mice (n=2 control mice, n=3 ancrod mice, unpaired Student's *t*-test, \*P<0.05, \*\*P<0.01, ns, not significant). EPL, external plexiform layer, GL, glomerular layer.

## **Pous et al., Supplementary Table 1**

List of top differentially expressed genes in WT NSPCs 12 h after fibrinogen treatment

### List of the top 215 upregulated genes

| WT 12h fibrinogen vs. WT untreated |          |               |             |          |          |
|------------------------------------|----------|---------------|-------------|----------|----------|
| Rank                               | ID-Ref   | Gene Symbol   | Fold-Change | P-value  | Q-value  |
| 1                                  | 10391798 | Gfap          | 8,0         | 9,09E-14 | 2,59E-09 |
| 2                                  | 10518494 | Ptchd2        | 7,3         | 4,62E-09 | 5,12E-07 |
| 3                                  | 10533050 | Hspb8         | 6,3         | 1,20E-10 | 4,03E-08 |
| 4                                  | 10510299 | Fbxo2         | 6,1         | 2,06E-11 | 1,68E-08 |
| 5                                  | 10581388 | Lcat          | 6,0         | 4,76E-11 | 2,24E-08 |
| 6                                  | 10462507 | Paps2         | 5,9         | 1,96E-09 | 2,74E-07 |
| 7                                  | 10477169 | Id1           | 5,8         | 1,40E-11 | 1,44E-08 |
| 8                                  | 10456392 | Cidea         | 5,5         | 1,64E-07 | 8,01E-06 |
| 9                                  | 10471154 | Gm5424 : Ass1 | 4,9         | 1,10E-10 | 3,83E-08 |
| 10                                 | 10454856 | Psd2          | 4,6         | 2,11E-10 | 5,67E-08 |
| 11                                 | 10600169 | Bgn           | 4,5         | 3,51E-08 | 2,36E-06 |
| 12                                 | 10351430 | Rxrg          | 4,4         | 4,86E-06 | 1,08E-04 |
| 13                                 | 10457614 | Aqp4          | 4,4         | 2,38E-11 | 1,69E-08 |
| 14                                 | 10492091 | Smad9         | 4,3         | 5,22E-11 | 2,36E-08 |
| 15                                 | 10369932 | Susd2         | 4,3         | 6,46E-06 | 1,34E-04 |
| 16                                 | 10543428 | Iqub          | 4,2         | 6,41E-10 | 1,28E-07 |
| 17                                 | 10509838 | Padi2         | 4,2         | 5,31E-11 | 2,36E-08 |
| 18                                 | 10469066 | Ccdc3         | 4,0         | 1,87E-08 | 1,48E-06 |
| 19                                 | 10512919 | Grin3a        | 3,9         | 4,55E-07 | 1,71E-05 |
| 20                                 | 10391828 | C1ql1         | 3,9         | 7,12E-10 | 1,39E-07 |
| 21                                 | 10530059 | Sel1l3        | 3,8         | 3,70E-10 | 8,49E-08 |
| 22                                 | 10464030 | Adra2a        | 3,7         | 4,64E-09 | 5,12E-07 |
| 23                                 | 10392464 | Fam20a        | 3,7         | 1,13E-09 | 1,87E-07 |
| 24                                 | 10545372 | Atoh8         | 3,4         | 5,61E-10 | 1,16E-07 |
| 25                                 | 10429802 | Plec          | 3,4         | 1,78E-09 | 2,54E-07 |
| 26                                 | 10517287 | Man1c1        | 3,4         | 7,36E-07 | 2,52E-05 |
| 27                                 | 10535065 | Adap1         | 3,3         | 1,20E-05 | 2,16E-04 |
| 28                                 | 10383717 | Inpp5j        | 3,3         | 2,60E-06 | 6,64E-05 |
| 29                                 | 10521415 | Ablim2        | 3,2         | 1,70E-10 | 4,99E-08 |
| 30                                 | 10399465 | Fam84a        | 3,2         | 9,88E-09 | 9,25E-07 |
| 31                                 | 10404836 | Rnf182        | 3,1         | 3,65E-08 | 2,43E-06 |
| 32                                 | 10480035 | Pfkfb3        | 3,1         | 1,42E-08 | 1,21E-06 |
| 33                                 | 10470959 | Phyhd1        | 3,1         | 4,70E-09 | 5,15E-07 |
| 34                                 | 10454851 | Cxhc5         | 3,1         | 2,56E-07 | 1,10E-05 |
| 35                                 | 10437205 | Pcp4          | 3,0         | 1,02E-05 | 1,92E-04 |
| 36                                 | 10539111 | Tmem150a      | 3,0         | 3,09E-08 | 2,17E-06 |
| 37                                 | 10494643 | Hmgcs2        | 3,0         | 2,20E-09 | 2,98E-07 |
| 38                                 | 10495035 | Slc16a1       | 3,0         | 5,83E-06 | 1,24E-04 |
| 39                                 | 10434089 | Ccdc74a       | 3,0         | 5,81E-06 | 1,24E-04 |
| 40                                 | 10371379 | Nuak1         | 2,9         | 6,98E-07 | 2,43E-05 |
| 41                                 | 10472923 | Ak4           | 2,9         | 7,82E-09 | 7,76E-07 |
| 42                                 | 10502655 | Cyr61         | 2,9         | 7,99E-08 | 4,58E-06 |

|    |          |                   |     |          |             |
|----|----------|-------------------|-----|----------|-------------|
| 43 | 10470214 | Kcnt1             | 2,9 | 2,43E-08 | 1,80E-06    |
| 44 | 10364784 | Reep6             | 2,8 | 7,14E-07 | 2,47E-05    |
| 45 | 10523021 | Slc4a4            | 2,8 | 4,11E-09 | 4,73E-07    |
| 46 | 10459530 | B430212C06Rik     | 2,8 | 1,05E-06 | 3,30E-05    |
| 47 | 10455967 | 2610318N02Rik     | 2,8 | 4,91E-09 | 5,35E-07    |
| 48 | 10351465 | 1700084C01Rik     | 2,8 | 1,60E-08 | 1,33E-06    |
| 49 | 10421730 | AU021034          | 2,8 | 2,44E-07 | 1,05E-05    |
| 50 | 10569020 | Ifitm6            | 2,8 | 1,05E-08 | 9,62E-07    |
| 51 | 10451225 | Polh              | 2,8 | 4,18E-08 | 2,73E-06    |
| 52 | 10416057 | Clu               | 2,8 | 2,12E-09 | 2,88E-07    |
| 53 | 10607738 | Car5b             | 2,8 | 9,11E-09 | 8,72E-07    |
| 54 | 10574166 | Cpne2             | 2,7 | 9,18E-07 | 2,97E-05    |
| 55 | 10408850 | Nedd9             | 2,7 | 2,89E-07 | 1,21E-05    |
| 56 | 10394685 | Ntsr2             | 2,7 | 2,44E-07 | 1,06E-05    |
| 57 | 10601729 | Drp2              | 2,7 | 1,93E-06 | 5,28E-05    |
| 58 | 10587818 | Plscr4            | 2,7 | 1,10E-09 | 1,84E-07    |
| 59 | 10600210 | Slc6a8            | 2,7 | 1,27E-08 | 1,11E-06    |
| 60 | 10373768 | Selm              | 2,7 | 4,27E-04 | 0,002911993 |
| 61 | 10571444 | Slc7a2            | 2,6 | 8,77E-06 | 1,71E-04    |
| 62 | 10587799 | Plscr2            | 2,6 | 6,85E-09 | 7,11E-07    |
| 63 | 10474229 | Cd59a : Cd59b     | 2,6 | 2,80E-05 | 3,99E-04    |
| 64 | 10392415 | Rgs9              | 2,6 | 1,19E-06 | 3,64E-05    |
| 65 | 10460400 | Pcx               | 2,6 | 8,90E-09 | 8,67E-07    |
| 66 | 10397962 | Fam181a           | 2,6 | 5,91E-07 | 2,11E-05    |
| 67 | 10580473 | Zfp423            | 2,6 | 1,12E-07 | 5,95E-06    |
| 68 | 10404975 | Id4               | 2,5 | 2,26E-09 | 3,05E-07    |
| 69 | 10345411 | Arhgef4           | 2,5 | 9,46E-08 | 5,26E-06    |
| 70 | 10372730 | Iltifb            | 2,5 | 2,04E-06 | 5,53E-05    |
| 71 | 10514300 | Ifna12            | 2,5 | 1,01E-04 | 0,001009845 |
| 72 | 10453233 | Slc8a1            | 2,5 | 2,91E-07 | 1,21E-05    |
| 73 | 10469389 | Slc39a12          | 2,5 | 6,27E-08 | 3,76E-06    |
| 74 | 10458560 | Fgf1              | 2,5 | 1,08E-07 | 5,80E-06    |
| 75 | 10530421 | Gabra4            | 2,5 | 1,30E-04 | 0,001212414 |
| 76 | 10595680 | Tbc1d2b           | 2,5 | 1,72E-07 | 8,26E-06    |
| 77 | 10440903 | 4932438H23Rik     | 2,4 | 4,04E-09 | 4,69E-07    |
| 78 | 10409261 | Diras2            | 2,4 | 1,15E-04 | 0,001118226 |
| 79 | 10565627 | Aqp11             | 2,4 | 5,91E-05 | 6,81E-04    |
| 80 | 10510129 | Dhrs3             | 2,4 | 1,65E-06 | 4,66E-05    |
| 81 | 10528385 | Reln              | 2,4 | 6,48E-07 | 2,28E-05    |
| 82 | 10502863 | Ak5               | 2,4 | 2,56E-06 | 6,59E-05    |
| 83 | 10381298 | Ramp2             | 2,4 | 2,96E-06 | 7,32E-05    |
| 84 | 10389816 | Tom1l1 : Cox11    | 2,4 | 7,83E-09 | 7,76E-07    |
| 85 | 10594044 | Islr              | 2,4 | 3,32E-08 | 2,28E-06    |
| 86 | 10509163 | Id3               | 2,4 | 3,48E-09 | 4,21E-07    |
| 87 | 10548051 | Kcna6             | 2,4 | 2,55E-09 | 3,34E-07    |
| 88 | 10562211 | Fxyd1             | 2,4 | 1,88E-07 | 8,85E-06    |
| 89 | 10372528 | Kcnmb4 : 1700058C | 2,4 | 3,04E-06 | 7,46E-05    |
| 90 | 10417628 | Cadps             | 2,4 | 1,19E-07 | 6,25E-06    |
| 91 | 10439542 | Zdhhc23           | 2,4 | 1,34E-08 | 1,16E-06    |
| 92 | 10529875 | Ldb2              | 2,3 | 1,95E-05 | 3,08E-04    |

|     |                        |          |             |          |
|-----|------------------------|----------|-------------|----------|
| 93  | 10430818 Tnfrsf13c     | 2,3      | 7,27E-05    | 7,91E-04 |
| 94  | 10530819 Hopx          | 2,3      | 1,26E-08    | 1,11E-06 |
| 95  | 10429754 Nrpb2         | 2,3      | 6,18E-11    | 2,55E-08 |
| 96  | 10571865 Scrg1         | 2,3      | 3,34E-11    | 1,90E-08 |
| 97  | 10604175 Fam70a        | 2,3      | 4,71E-09    | 5,15E-07 |
| 98  | 10492330 P2ry1         | 2,3      | 4,07E-08    | 2,67E-06 |
| 99  | 10354003 Mgat4a        | 2,3      | 5,60E-05    | 6,54E-04 |
| 100 | 10406777 Gcnt4         | 2,3      | 7,36E-05    | 7,98E-04 |
| 101 | 10453390 Six3os1       | 1,96E-05 | 3,09E-04    | 2,3      |
| 102 | 10425623 Csd2          | 1,04E-09 | 1,76E-07    | 2,3      |
| 103 | 10355806 Tuba4a        | 4,83E-08 | 3,08E-06    | 2,3      |
| 104 | 10488762 Snta1         | 9,62E-06 | 1,83E-04    | 2,3      |
| 105 | 10518735 Spsb1         | 1,10E-05 | 2,01E-04    | 2,3      |
| 106 | 10546829 Oxtr          | 6,42E-05 | 7,24E-04    | 2,3      |
| 107 | 10417972 Camk2g        | 1,99E-08 | 1,56E-06    | 2,3      |
| 108 | 10462603 Fas           | 4,87E-08 | 3,09E-06    | 2,3      |
| 109 | 10500204 Ecm1          | 9,13E-07 | 2,96E-05    | 2,2      |
| 110 | 10407173 Il6st         | 1,96E-08 | 1,53E-06    | 2,2      |
| 111 | 10357878 Adora1        | 3,58E-08 | 2,40E-06    | 2,2      |
| 112 | 10528702 Prkag2        | 1,17E-07 | 6,18E-06    | 2,2      |
| 113 | 10440344 Robo2         | 7,23E-07 | 2,49E-05    | 2,2      |
| 114 | 10400405 Nfkb1a        | 3,56E-07 | 1,41E-05    | 2,2      |
| 115 | 10473432 Tnks1bp1      | 1,69E-07 | 8,19E-06    | 2,2      |
| 116 | 10398075 Serpina3n     | 9,09E-06 | 1,75E-04    | 2,2      |
| 117 | 10532538 Aspfd2        | 1,40E-07 | 7,10E-06    | 2,2      |
| 118 | 10480275 Neb1          | 5,42E-09 | 5,84E-07    | 2,2      |
| 119 | 10444895 Flot1         | 3,37E-07 | 1,35E-05    | 2,2      |
| 120 | 10372648 Lyz2          | 3,45E-06 | 8,31E-05    | 2,2      |
| 121 | 10452151 Rfx2          | 4,12E-06 | 9,49E-05    | 2,2      |
| 122 | 10541354 A2m           | 8,87E-08 | 5,02E-06    | 2,2      |
| 123 | 10544062 D630045J12Rik | 3,07E-06 | 7,51E-05    | 2,2      |
| 124 | 10360666 6330403A02Rik | 1,43E-07 | 7,18E-06    | 2,2      |
| 125 | 10447697 6530411M01Rik | 1,09E-06 | 3,40E-05    | 2,2      |
| 126 | 10594418 Smad6         | 6,28E-07 | 2,22E-05    | 2,2      |
| 127 | 10364502 Palm          | 1,47E-08 | 1,24E-06    | 2,2      |
| 128 | 10489484 Sdc4          | 1,19E-09 | 1,93E-07    | 2,2      |
| 129 | 10376241 Zic5          | 9,91E-07 | 3,16E-05    | 2,2      |
| 130 | 10357339 Gpr39 : Lypd1 | 4,29E-06 | 9,79E-05    | 2,2      |
| 131 | 10495675 F3            | 1,51E-07 | 7,50E-06    | 2,2      |
| 132 | 10553092 Sphk2 : Dbp   | 4,05E-07 | 1,57E-05    | 2,2      |
| 133 | 10583021 Pdgfd         | 1,66E-04 | 0,001453659 | 2,2      |
| 134 | 10433172 Glycam1       | 1,27E-06 | 3,82E-05    | 2,2      |
| 135 | 10430319 Tst           | 4,87E-08 | 3,09E-06    | 2,1      |
| 136 | 10352234 Itpkb         | 1,02E-09 | 1,73E-07    | 2,1      |
| 137 | 10575693 Vat1l         | 2,79E-05 | 3,98E-04    | 2,1      |
| 138 | 10546725 Pdzn3         | 2,02E-07 | 9,29E-06    | 2,1      |
| 139 | 10546421 Prickle2      | 3,48E-07 | 1,39E-05    | 2,1      |
| 140 | 10431711 Slc2a13       | 1,05E-04 | 0,001039063 | 2,1      |
| 141 | 10476108 Ebf4          | 9,26E-09 | 8,81E-07    | 2,1      |
| 142 | 10500283 Car14 : Aph1a | 3,89E-04 | 0,002717008 | 2,1      |

|     |                                |            |             |     |
|-----|--------------------------------|------------|-------------|-----|
| 143 | 10466712 Mamdc2                | 1,93E-05   | 3,05E-04    | 2,1 |
| 144 | 10498576 Lxn                   | 1,13E-08   | 1,02E-06    | 2,1 |
| 145 | 10345074 Cetn4                 | 1,57E-06   | 4,49E-05    | 2,1 |
| 146 | 10418927 Bmpr1a                | 7,71E-07   | 2,62E-05    | 2,1 |
| 147 | 10440099 Dcbld2 : St3gal6      | 2,75E-07   | 1,16E-05    | 2,1 |
| 148 | 10595718 Chst2                 | 1,46E-06   | 4,25E-05    | 2,1 |
| 149 | 10458340 Hbegf                 | 3,76E-07   | 1,48E-05    | 2,1 |
| 150 | 10465314 Capn1                 | 1,13E-04   | 0,00110047  | 2,1 |
| 151 | 10539238 Fam176a               | 2,33E-05   | 3,50E-04    | 2,1 |
| 152 | 10351131 Myoc                  | 2,50E-06   | 6,49E-05    | 2,1 |
| 153 | 10540059 Slc41a3               | 4,58E-10   | 9,95E-08    | 2,1 |
| 154 | 10489629 Cdh22                 | 6,28E-05   | 7,13E-04    | 2,1 |
| 155 | 10562399 Kctd15                | 1,13E-06   | 3,51E-05    | 2,1 |
| 156 | 10450242 C4b : C4a             | 8,96E-06   | 1,74E-04    | 2,1 |
| 157 | 10501903 Synpo2                | 1,27E-06   | 3,82E-05    | 2,1 |
| 158 | 10464775 Lrfn4                 | 1,87E-08   | 1,48E-06    | 2,1 |
| 159 | 10516259 Dnali1                | 2,64E-06   | 6,73E-05    | 2,1 |
| 160 | 10578623 Wwc2                  | 6,62E-06   | 1,37E-04    | 2,1 |
| 161 | 10387255 Hes7                  | 2,24E-07   | 9,97E-06    | 2,1 |
| 162 | 10549276 Bhlhe41               | 3,09E-07   | 1,26E-05    | 2,0 |
| 163 | 10481491 Ier5l                 | 1,23E-07   | 6,45E-06    | 2,0 |
| 164 | 10461869 Prune2                | 9,87E-06   | 1,86E-04    | 2,0 |
| 165 | 10389752 Nog                   | 1,23E-04   | 0,001168822 | 2,0 |
| 166 | 10512807 Gabbr2                | 1,77E-05   | 2,87E-04    | 2,0 |
| 167 | 10401244 Actn1                 | 4,73E-07   | 1,77E-05    | 2,0 |
| 168 | 10407766 Lgals8                | 1,27E-09   | 1,99E-07    | 2,0 |
| 169 | 10388430 Serpinf1              | 1,96E-05   | 3,09E-04    | 2,0 |
| 170 | 10356932 D1Ertd622e            | 2,19E-08   | 1,68E-06    | 2,0 |
| 171 | 10433618 Shisa9                | 5,55E-09   | 5,94E-07    | 2,0 |
| 172 | 10439483 Arhgap31              | 1,98E-07   | 9,16E-06    | 2,0 |
| 173 | 10357833 Atp2b4                | 1,65E-04   | 0,001444985 | 2,0 |
| 174 | 10510191 Zfp600                | 0,00750944 | 0,024912223 | 2,0 |
| 175 | 10513112 Epb4.1l4b             | 1,12E-07   | 5,94E-06    | 2,0 |
| 176 | 10536494 Cav2                  | 1,67E-06   | 4,69E-05    | 2,0 |
| 177 | 10363231 Smpdl3a               | 1,45E-09   | 2,14E-07    | 2,0 |
| 178 | 10521678 Cd38                  | 1,06E-07   | 5,77E-06    | 2,0 |
| 179 | 10553537 Luzp2                 | 9,45E-04   | 0,0052941   | 2,0 |
| 180 | 10345550 Vwa3b                 | 3,41E-05   | 4,55E-04    | 2,0 |
| 181 | 10407876 5033411D12Rik         | 7,17E-07   | 2,48E-05    | 2,0 |
| 182 | 10587880 Pcolce2               | 3,09E-05   | 4,25E-04    | 2,0 |
| 183 | 10462957 Tbc1d12               | 4,34E-07   | 1,65E-05    | 2,0 |
| 184 | 10561104 Axl                   | 7,82E-07   | 2,64E-05    | 2,0 |
| 185 | 10598493 Pcsk1n                | 6,89E-08   | 4,08E-06    | 2,0 |
| 186 | 10592535 Sorl1                 | 1,64E-07   | 7,99E-06    | 2,0 |
| 187 | 10395733 Npas3                 | 5,26E-07   | 1,92E-05    | 2,0 |
| 188 | 10574018 Mt3                   | 1,40E-10   | 4,37E-08    | 2,0 |
| 189 | 10441361 Tfb1m : Tiam2         | 2,12E-07   | 9,63E-06    | 2,0 |
| 190 | 10365482 Timp3                 | 1,08E-04   | 0,001062427 | 2,0 |
| 191 | 10601874 Tceal3 : Tceal6 : Tce | 2,15E-05   | 3,30E-04    | 2,0 |
| 192 | 10470014 Entpd2                | 9,01E-05   | 9,30E-04    | 2,0 |



|     |                               |             |             |     |
|-----|-------------------------------|-------------|-------------|-----|
| 193 | 10400304 EglN3                | 1,01E-04    | 0,001011072 | 2,0 |
| 194 | 10411107 Cmya5 : Gm4814       | 9,85E-07    | 3,14E-05    | 2,0 |
| 195 | 10407792 Gpr137b-ps : Gpr137b | 1,76E-08    | 1,42E-06    | 1,9 |
| 196 | 10498952 Gucy1a3              | 0,001304728 | 0,006741965 | 1,9 |
| 197 | 10427683 Spef2                | 1,99E-05    | 3,11E-04    | 1,9 |
| 198 | 10519105 Ski                  | 8,55E-06    | 1,68E-04    | 1,9 |
| 199 | 10420935 Ephx2                | 2,58E-06    | 6,61E-05    | 1,9 |
| 200 | 10407803 Gpr137b              | 1,70E-07    | 8,23E-06    | 1,9 |
| 201 | 10514939 Podn                 | 8,90E-07    | 2,90E-05    | 1,9 |
| 202 | 10602221 Mir680-2             | 1,18E-05    | 2,13E-04    | 1,9 |
| 203 | 10575160 Nfat5                | 1,37E-07    | 6,99E-06    | 1,9 |
| 204 | 10447602 Ezr                  | 4,27E-07    | 1,63E-05    | 1,9 |
| 205 | 10475544 Sema6d               | 2,31E-08    | 1,73E-06    | 1,9 |
| 206 | 10511631 Slc26a7              | 8,49E-07    | 2,81E-05    | 1,9 |
| 207 | 10578222 A730069N07Rik : D    | 3,73E-06    | 8,81E-05    | 1,9 |
| 208 | 10566043 Lrrc51               | 2,57E-07    | 1,10E-05    | 1,9 |
| 209 | 10530870 Epha5                | 6,74E-06    | 1,39E-04    | 1,9 |
| 210 | 10397606 Tshr                 | 3,45E-04    | 0,002490002 | 1,9 |
| 211 | 10433988 Serpind1             | 1,93E-07    | 9,02E-06    | 1,9 |
| 212 | 10494781 Igsf3                | 1,79E-06    | 4,97E-05    | 1,9 |
| 213 | 10438854 Atp13a4              | 2,22E-05    | 3,37E-04    | 1,9 |
| 214 | 10528183 Speer4d : Speer4c :  | 3,18E-06    | 7,75E-05    | 1,9 |
| 215 | 10419578 Ndrp2                | 1,32E-06    | 3,93E-05    | 1,9 |

## List of the top 215 downregulated genes

WT 12h fibrinogen vs. WT untreated

| Rank | ID-Ref   | Gene Symbol    | Fold-Change | P-value  | Q-value  |
|------|----------|----------------|-------------|----------|----------|
| 1    | 10487480 | Bub1           | 13,6        | 1,59E-11 | 1,51E-08 |
| 2    | 10385248 | Hmmr           | 13,4        | 7,94E-11 | 2,97E-08 |
| 3    | 10378053 | Fam64a         | 13,2        | 5,04E-10 | 1,09E-07 |
| 4    | 10557156 | Plk1           | 12,3        | 1,73E-09 | 2,49E-07 |
| 5    | 10462796 | Kif11          | 11,3        | 1,93E-10 | 5,42E-08 |
| 6    | 10377405 | Aurkb          | 11,0        | 1,29E-12 | 7,18E-09 |
| 7    | 10497831 | Ccna2          | 10,4        | 3,27E-09 | 4,00E-07 |
| 8    | 10390707 | Top2a          | 10,3        | 1,35E-09 | 2,04E-07 |
| 9    | 10454709 | Kif20a : Cdc23 | 10,3        | 2,49E-11 | 1,69E-08 |
| 10   | 10601011 | Kif4           | 10,0        | 5,74E-10 | 1,17E-07 |
| 11   | 10448506 | Ccnf           | 9,8         | 9,57E-12 | 1,40E-08 |
| 12   | 10515836 | Ccnb1          | 9,8         | 1,14E-08 | 1,03E-06 |
| 13   | 10400589 | C79407         | 9,6         | 2,46E-11 | 1,69E-08 |
| 14   | 10420426 | F630043A04R    | 9,5         | 9,22E-12 | 1,40E-08 |
| 15   | 10554445 | Prc1           | 9,5         | 2,52E-09 | 3,33E-07 |
| 16   | 10563883 | Depdc1a        | 9,3         | 3,90E-12 | 1,31E-08 |
| 17   | 10420877 | Esco2          | 9,2         | 2,25E-11 | 1,69E-08 |
| 18   | 10515431 | Kif2c          | 9,0         | 7,64E-11 | 2,97E-08 |
| 19   | 10497520 | Ect2           | 8,7         | 6,90E-09 | 7,14E-07 |
| 20   | 10496204 | Cenpe          | 8,7         | 1,14E-10 | 3,87E-08 |
| 21   | 10477187 | Tpx2           | 8,5         | 1,34E-09 | 2,03E-07 |
| 22   | 10419323 | Dlgap5         | 8,2         | 1,26E-10 | 4,07E-08 |
| 23   | 10462866 | Cep55          | 8,2         | 8,53E-12 | 1,40E-08 |
| 24   | 10369815 | Cdk1           | 7,9         | 1,19E-11 | 1,44E-08 |
| 25   | 10350392 | Aspm           | 7,8         | 2,30E-10 | 5,95E-08 |
| 26   | 10474769 | Bub1b          | 7,8         | 6,35E-10 | 1,28E-07 |
| 27   | 10371770 | Gas2l3         | 7,8         | 2,80E-10 | 6,88E-08 |
| 28   | 10521731 | Ncapg          | 7,8         | 4,61E-12 | 1,31E-08 |
| 29   | 10404063 | Hist1h2ab      | 7,7         | 5,04E-11 | 2,31E-08 |
| 30   | 10474875 | Casc5          | 7,7         | 1,34E-11 | 1,44E-08 |
| 31   | 10451805 | Sgol1          | 7,6         | 9,87E-12 | 1,40E-08 |
| 32   | 10460738 | Cdca5          | 7,6         | 5,17E-12 | 1,34E-08 |
| 33   | 10458195 | Cdc25c         | 7,6         | 2,29E-10 | 5,95E-08 |
| 34   | 10350838 | 2810417H13R    | 7,5         | 1,06E-12 | 7,18E-09 |
| 35   | 10507112 | Stil           | 7,4         | 1,47E-11 | 1,44E-08 |
| 36   | 10394978 | Rrm2           | 7,4         | 1,65E-11 | 1,52E-08 |
| 37   | 10483401 | Spc25          | 7,4         | 1,88E-11 | 1,62E-08 |
| 38   | 10568150 | Kif22          | 7,3         | 1,45E-11 | 1,44E-08 |
| 39   | 10515744 | Cdc20          | 7,2         | 1,72E-10 | 4,99E-08 |
| 40   | 10416037 | Pbk            | 7,2         | 3,58E-09 | 4,30E-07 |
| 41   | 10578690 | Neil3          | 7,1         | 2,87E-11 | 1,77E-08 |
| 42   | 10587508 | Ttk            | 7,0         | 4,43E-11 | 2,17E-08 |

|    |                        |     |          |          |
|----|------------------------|-----|----------|----------|
| 43 | 10432511 Racgap1       | 7,0 | 1,86E-09 | 2,64E-07 |
| 44 | 10594251 Kif23         | 6,9 | 7,67E-12 | 1,40E-08 |
| 45 | 10359890 Nuf2          | 6,9 | 3,41E-10 | 7,88E-08 |
| 46 | 10346365 Sgol2         | 6,8 | 2,03E-10 | 5,60E-08 |
| 47 | 10486255 Oip5 : Nusap1 | 6,7 | 2,55E-11 | 1,69E-08 |
| 48 | 10436106 C330027C09R   | 6,7 | 7,84E-11 | 2,97E-08 |
| 49 | 10490104 Aurka         | 6,6 | 1,52E-12 | 7,18E-09 |
| 50 | 10590494 Kif15         | 6,5 | 1,35E-11 | 1,44E-08 |
| 51 | 10414315 Cdkn3         | 6,5 | 8,38E-10 | 1,54E-07 |
| 52 | 10421029 Cdca2         | 6,5 | 3,83E-11 | 1,99E-08 |
| 53 | 10575733 Cenpn         | 6,3 | 1,20E-11 | 1,44E-08 |
| 54 | 10568714 Mki67         | 6,3 | 1,44E-08 | 1,22E-06 |
| 55 | 10520521 Cenpa         | 6,3 | 4,44E-10 | 9,71E-08 |
| 56 | 10389606 Prr11         | 6,3 | 6,68E-12 | 1,40E-08 |
| 57 | 10391811 Kif18b        | 6,2 | 2,36E-10 | 6,03E-08 |
| 58 | 10516246 Cdca8         | 6,2 | 1,47E-10 | 4,55E-08 |
| 59 | 10591781 Anln          | 6,2 | 4,18E-12 | 1,31E-08 |
| 60 | 10576883 Shcbp1        | 6,2 | 3,78E-10 | 8,59E-08 |
| 61 | 10405185 Cks2          | 6,1 | 7,95E-11 | 2,97E-08 |
| 62 | 10504470 Melk          | 5,8 | 1,37E-11 | 1,44E-08 |
| 63 | 10487340 Ncaph         | 5,8 | 3,87E-13 | 5,50E-09 |
| 64 | 10361375 Fbxo5         | 5,8 | 1,73E-09 | 2,49E-07 |
| 65 | 10360985 Cenpf         | 5,7 | 5,26E-10 | 1,12E-07 |
| 66 | 10528077 Dbf4          | 5,6 | 3,26E-11 | 1,89E-08 |
| 67 | 10541729 Cdca3         | 5,6 | 5,01E-09 | 5,42E-07 |
| 68 | 10426669 Troap         | 5,5 | 3,53E-11 | 1,97E-08 |
| 69 | 10371591 Pmch : 49305  | 5,5 | 8,39E-11 | 3,10E-08 |
| 70 | 10594774 Ccnb2         | 5,5 | 5,20E-07 | 1,90E-05 |
| 71 | 10563780 E2f8          | 5,5 | 2,85E-12 | 1,16E-08 |
| 72 | 10480432 Mastl         | 5,5 | 1,99E-10 | 5,56E-08 |
| 73 | 10485963 Arhgap11a     | 5,5 | 2,93E-11 | 1,77E-08 |
| 74 | 10352767 Nek2          | 5,4 | 5,29E-10 | 1,12E-07 |
| 75 | 10524169 Pole          | 5,4 | 3,77E-11 | 1,99E-08 |
| 76 | 10572906 Mcm5          | 5,4 | 3,22E-10 | 7,57E-08 |
| 77 | 10573261 Asf1b         | 5,4 | 2,45E-10 | 6,15E-08 |
| 78 | 10462632 Kif20b        | 5,3 | 1,82E-11 | 1,62E-08 |
| 79 | 10478572 Tnnc2 : Ube2c | 5,2 | 6,08E-08 | 3,67E-06 |
| 80 | 10485979 Gjd2          | 5,2 | 2,11E-10 | 5,67E-08 |
| 81 | 10526952 Gpr30         | 5,1 | 2,46E-11 | 1,69E-08 |
| 82 | 10542079 4933413G19R   | 5,1 | 2,07E-10 | 5,67E-08 |
| 83 | 10487577 Ckap2l        | 5,1 | 1,17E-09 | 1,90E-07 |
| 84 | 10491805 Plk4          | 5,0 | 1,75E-10 | 5,03E-08 |
| 85 | 10399391 Gen1          | 5,0 | 2,98E-10 | 7,13E-08 |
| 86 | 10350297 Kif14         | 5,0 | 2,87E-09 | 3,68E-07 |
| 87 | 10538832 Mad2l1        | 4,9 | 6,12E-11 | 2,55E-08 |
| 88 | 10452709 Ndc80         | 4,9 | 1,58E-08 | 1,32E-06 |
| 89 | 10601705 Cenpi         | 4,8 | 1,72E-10 | 4,99E-08 |
| 90 | 10485982 Actc1         | 4,8 | 1,81E-06 | 5,01E-05 |
| 91 | 10450374 D17H6S56E-5   | 4,8 | 1,96E-08 | 1,53E-06 |
| 92 | 10474381 Kif18a        | 4,8 | 8,91E-10 | 1,59E-07 |

|     |                        |     |          |          |
|-----|------------------------|-----|----------|----------|
| 93  | 10461723 Fam111a       | 4,8 | 2,95E-09 | 3,75E-07 |
| 94  | 10474825 D2Ertd750e    | 4,8 | 1,13E-07 | 5,98E-06 |
| 95  | 10382998 Birc5         | 4,6 | 8,59E-12 | 1,40E-08 |
| 96  | 10540738 Fancd2        | 4,6 | 1,37E-10 | 4,32E-08 |
| 97  | 10465861 Incenp        | 4,5 | 5,92E-11 | 2,53E-08 |
| 98  | 10366983 Tmem194       | 4,5 | 7,47E-11 | 2,95E-08 |
| 99  | 10554325 5730590G19R   | 4,5 | 5,47E-11 | 2,39E-08 |
| 100 | 10426016 Gtse1         | 4,4 | 5,87E-10 | 1,19E-07 |
| 101 | 10525591 Kntc1         | 4,4 | 6,93E-10 | 1,38E-07 |
| 102 | 10351047 Cenpl         | 4,4 | 2,05E-11 | 1,68E-08 |
| 103 | 10594426 Zwilch : Lctl | 4,3 | 7,84E-10 | 1,47E-07 |
| 104 | 10361995 Fam54a        | 4,3 | 2,13E-10 | 5,67E-08 |
| 105 | 10399087 Ncapg2        | 4,2 | 2,53E-09 | 3,33E-07 |
| 106 | 10584710 H2afx         | 4,2 | 4,55E-11 | 2,19E-08 |
| 107 | 10416736 6720463M24f   | 4,2 | 8,04E-10 | 1,48E-07 |
| 108 | 10406968 Cenpk : Ppwd: | 4,2 | 1,25E-11 | 1,44E-08 |
| 109 | 10504957 Smc2          | 4,2 | 4,35E-10 | 9,60E-08 |
| 110 | 10565570 4632434I11Ri  | 4,2 | 1,31E-10 | 4,20E-08 |
| 111 | 10363743 Rtkn2         | 4,2 | 2,38E-10 | 6,03E-08 |
| 112 | 10499639 Cks1b         | 4,1 | 8,68E-13 | 7,18E-09 |
| 113 | 10393662 Nptx1         | 4,1 | 1,32E-09 | 2,02E-07 |
| 114 | 10547943 Ncapd2        | 4,1 | 8,77E-10 | 1,59E-07 |
| 115 | 10592154 Hyls1         | 4,1 | 3,84E-11 | 1,99E-08 |
| 116 | 10450957 Cenpq         | 4,1 | 1,59E-10 | 4,81E-08 |
| 117 | 10604542 Hs6st2        | 4,0 | 2,64E-10 | 6,54E-08 |
| 118 | 10392374 Cacng5        | 4,0 | 2,10E-09 | 2,88E-07 |
| 119 | 10493137 Iqgap3        | 4,0 | 9,33E-11 | 3,36E-08 |
| 120 | 10577508 Ckap2         | 3,9 | 4,81E-07 | 1,79E-05 |
| 121 | 10467529 Opalin        | 3,9 | 2,14E-08 | 1,65E-06 |
| 122 | 10404061 Hist1h2bb     | 3,9 | 1,25E-09 | 1,98E-07 |
| 123 | 10423520 Sema5a        | 3,8 | 1,16E-06 | 3,58E-05 |
| 124 | 10467637 Arhgap19      | 3,7 | 1,16E-09 | 1,89E-07 |
| 125 | 10443007 Neurl1B       | 3,7 | 2,80E-11 | 1,77E-08 |
| 126 | 10428763 Atad2         | 3,7 | 3,17E-09 | 3,94E-07 |
| 127 | 10455813 Lmnb1         | 3,7 | 8,57E-11 | 3,12E-08 |
| 128 | 10592201 Chek1         | 3,7 | 2,38E-11 | 1,69E-08 |
| 129 | 10361110 Dtl           | 3,7 | 3,21E-11 | 1,89E-08 |
| 130 | 10384373 Figl1         | 3,6 | 1,25E-07 | 6,49E-06 |
| 131 | 10351551 Adamts4       | 3,6 | 1,20E-08 | 1,07E-06 |
| 132 | 10474902 Rad51         | 3,6 | 1,28E-09 | 1,99E-07 |
| 133 | 10453715 Rab18         | 3,6 | 5,40E-10 | 1,12E-07 |
| 134 | 10446074 Uhrf1         | 3,6 | 3,33E-07 | 1,34E-05 |
| 135 | 10521090 Tacc3         | 3,5 | 6,69E-11 | 2,70E-08 |
| 136 | 10456904 Pstpip2       | 3,5 | 5,22E-05 | 6,27E-04 |
| 137 | 10350090 Ube2t         | 3,5 | 1,87E-09 | 2,65E-07 |
| 138 | 10373680 Neurod4       | 3,5 | 1,83E-07 | 8,65E-06 |
| 139 | 10497503 Kpna2         | 3,5 | 2,25E-11 | 1,69E-08 |
| 140 | 10594289 Glce          | 3,4 | 5,37E-10 | 1,12E-07 |
| 141 | 10430389 Mfng          | 3,4 | 6,73E-11 | 2,70E-08 |
| 142 | 10556266 Wee1          | 3,4 | 7,69E-09 | 7,71E-07 |

|     |                         |     |          |          |
|-----|-------------------------|-----|----------|----------|
| 143 | 10368317 Enpp3          | 3,4 | 8,68E-09 | 8,48E-07 |
| 144 | 10511429 Car8           | 3,4 | 7,05E-09 | 7,27E-07 |
| 145 | 10546163 Mcm2           | 3,3 | 8,78E-10 | 1,59E-07 |
| 146 | 10430825 Cenpm          | 3,3 | 4,28E-08 | 2,78E-06 |
| 147 | 10377215 Gas7           | 3,3 | 3,38E-08 | 2,30E-06 |
| 148 | 10411728 Cenph          | 3,3 | 2,46E-10 | 6,15E-08 |
| 149 | 10464400 E330013P04R    | 3,2 | 1,07E-10 | 3,75E-08 |
| 150 | 10396402 Prkch          | 3,2 | 2,07E-08 | 1,60E-06 |
| 151 | 10524790 Cit            | 3,2 | 1,26E-10 | 4,07E-08 |
| 152 | 10427166 Espl1          | 3,1 | 7,23E-10 | 1,40E-07 |
| 153 | 10390050 Eme1           | 3,1 | 3,13E-10 | 7,42E-08 |
| 154 | 10571680 Ccdc111 : Mlf  | 3,1 | 4,39E-09 | 4,97E-07 |
| 155 | 10571870 Hmgb2          | 3,1 | 3,85E-10 | 8,63E-08 |
| 156 | 10488382 Cd93           | 3,1 | 1,27E-05 | 2,24E-04 |
| 157 | 10408081 Hist1h1b       | 3,1 | 3,38E-08 | 2,30E-06 |
| 158 | 10474002 Chrm4          | 3,1 | 1,65E-10 | 4,95E-08 |
| 159 | 10499366 Pmf1           | 3,1 | 3,67E-09 | 4,35E-07 |
| 160 | 10524266 Chek2          | 3,1 | 1,95E-09 | 2,74E-07 |
| 161 | 10574427 Impdh2         | 3,0 | 4,11E-06 | 9,49E-05 |
| 162 | 10385096 Kcnip1         | 3,0 | 6,67E-09 | 6,95E-07 |
| 163 | 10437040 Chaf1b         | 3,0 | 2,88E-10 | 7,00E-08 |
| 164 | 10476989 Gins1          | 3,0 | 6,17E-09 | 6,50E-07 |
| 165 | 10566723 Lmo1           | 3,0 | 1,28E-08 | 1,12E-06 |
| 166 | 10593233 Htr3a          | 3,0 | 2,60E-07 | 1,11E-05 |
| 167 | 10554281 Polg : Fanci   | 3,0 | 7,16E-09 | 7,35E-07 |
| 168 | 10546294 Nup210         | 3,0 | 9,77E-08 | 5,38E-06 |
| 169 | 10599627 Hpvt           | 3,0 | 2,64E-08 | 1,93E-06 |
| 170 | 10438690 Rfc4 : Eif4a2  | 3,0 | 4,80E-11 | 2,24E-08 |
| 171 | 10416340 Gfra2          | 3,0 | 2,69E-09 | 3,47E-07 |
| 172 | 10459755 Ska1           | 2,9 | 2,26E-08 | 1,70E-06 |
| 173 | 10444911 Mdc1           | 2,9 | 1,66E-08 | 1,36E-06 |
| 174 | 10528915 Tyms-ps : Tyr  | 2,9 | 2,32E-07 | 1,02E-05 |
| 175 | 10352267 Lin9           | 2,9 | 2,25E-10 | 5,94E-08 |
| 176 | 10550102 Lig1           | 2,9 | 2,37E-07 | 1,04E-05 |
| 177 | 10512489 E130306D19R    | 2,9 | 7,15E-08 | 4,17E-06 |
| 178 | 10395612 G2e3           | 2,9 | 3,76E-11 | 1,99E-08 |
| 179 | 10447649 LOC10003909    | 2,9 | 1,63E-07 | 7,94E-06 |
| 180 | 10555695 Rrm1           | 2,8 | 1,01E-09 | 1,73E-07 |
| 181 | 10586416 Pif1           | 2,8 | 3,93E-09 | 4,58E-07 |
| 182 | 10367076 Prim1          | 2,8 | 1,06E-09 | 1,77E-07 |
| 183 | 10509410 Rap1gap        | 2,8 | 7,32E-06 | 1,48E-04 |
| 184 | 10495574 Ccdc76 : Sassé | 2,8 | 1,14E-10 | 3,87E-08 |
| 185 | 10455967 2610318N02R    | 2,8 | 4,91E-09 | 5,35E-07 |
| 186 | 10518927 Kcnab2         | 2,8 | 6,60E-09 | 6,90E-07 |
| 187 | 10555510 Pde2a          | 2,8 | 2,29E-05 | 3,45E-04 |
| 188 | 10406581 Msh3 : Dhfr    | 2,8 | 1,67E-08 | 1,36E-06 |
| 189 | 10451225 Polh           | 2,8 | 4,18E-08 | 2,73E-06 |
| 190 | 10564978 Blm            | 2,8 | 2,25E-08 | 1,70E-06 |
| 191 | 10403943 Hist1h2bm      | 2,8 | 8,84E-10 | 1,59E-07 |
| 192 | 10508151 Clspn          | 2,7 | 9,46E-08 | 5,26E-06 |

|     |                        |     |          |            |
|-----|------------------------|-----|----------|------------|
| 193 | 10409424 Mxd3          | 2,7 | 3,98E-07 | 1,54E-05   |
| 194 | 10523923 Ccdc18        | 2,7 | 7,53E-08 | 4,35E-06   |
| 195 | 10548086 Rad51ap1      | 2,7 | 2,42E-06 | 6,33E-05   |
| 196 | 10418895 Zfp488        | 2,7 | 6,46E-05 | 7,27E-04   |
| 197 | 10523758 Lrrc8b        | 2,7 | 7,11E-10 | 1,39E-07   |
| 198 | 10466779 Pip5k1b       | 2,7 | 3,16E-04 | 0,00232452 |
| 199 | 10582809 Tk1           | 2,7 | 1,31E-07 | 6,76E-06   |
| 200 | 10381096 Igfbp4        | 2,7 | 3,09E-07 | 1,26E-05   |
| 201 | 10473125 Itga4         | 2,7 | 1,70E-08 | 1,38E-06   |
| 202 | 10469936 Nrarp         | 2,7 | 5,36E-06 | 1,17E-04   |
| 203 | 10485213 Cd82          | 2,7 | 6,06E-06 | 1,28E-04   |
| 204 | 10479811 Mcm10         | 2,7 | 7,74E-09 | 7,72E-07   |
| 205 | 10482500 Rnd3          | 2,7 | 9,39E-08 | 5,25E-06   |
| 206 | 10423109 Adamts12      | 2,7 | 3,15E-09 | 3,94E-07   |
| 207 | 10479698 Myt1          | 2,7 | 1,95E-04 | 0,001624   |
| 208 | 10490129 Bmp7          | 2,6 | 3,47E-09 | 4,21E-07   |
| 209 | 10428222 Ncald         | 2,6 | 7,98E-09 | 7,88E-07   |
| 210 | 10557519 Hirip3        | 2,6 | 1,40E-07 | 7,10E-06   |
| 211 | 10604837 Sox3          | 2,6 | 1,68E-08 | 1,36E-06   |
| 212 | 10498620 Trim59        | 2,6 | 2,48E-07 | 1,07E-05   |
| 213 | 10448615 Rab26 : Traf7 | 2,6 | 5,35E-08 | 3,30E-06   |
| 214 | 10360745 Lbr           | 2,6 | 1,33E-09 | 2,02E-07   |
| 215 | 10430748 Rangap1       | 2,6 | 1,01E-09 | 1,73E-07   |
